# Supplementary material
Source: PubMed Central journal article supplement (PMC2612447)
Supplement: supp_191_1_100__1.pdf [file supp_191_1_100__1.pdf]

### **Supplemental Data**

DegU and Spo0A jointly control transcription of two loci required for complex colony development by *Bacillus subtilis*.

**Daniel T. Verhamme, Ewan J. Murray and Nicola R. Stanley-Wall\***

Division of Molecular and Environmental Microbiology, College of Life Sciences,  
MSI/WTB/JBC Complex, University of Dundee, Dundee, UK DD1 5EH

\* For correspondence

Email: [n.r.stanleywall@dundee.ac.uk](mailto:n.r.stanleywall@dundee.ac.uk)

Tel: +44(0)1382 386335

Fax: +44(0)1382 386375

Key words

*Bacillus subtilis*, biofilm matrix, DegU, SinR, AbrB, Spo0A

## Results.

### The optimal *yvcA* promoter region.

During our initial characterisation of the *yvcA* promoter a 500-bp region ( $P_{500}$ ), upstream from the translational start site was utilised. The  $P_{500}$  region extended into the 3' end of the upstream *hisI* gene and allowed DegU~P dependent transcriptional activation and inhibition by low and high levels of DegU~P respectively, using *lacZ* as an *in vivo* reporter to be measured (3). We wanted to define the minimal promoter that could be used for further analysis. To achieve this we systematically truncated the promoter by 80bp from the -500 bp starting site. We were able to establish that 240 bp was the minimal region that retained the same regulatory characteristics as the -500bp regions (Fig. S1A). Such that it was activated by low levels of DegU~P, inhibited by high levels of DegU~P (Figure S1B), inhibited by AbrB and demonstrated enhanced transcription in the absence of *sinR* (data not shown). Additionally it could be used to drive expression of *yvcA* and complement the *yvcA* mutation (Figure S1C). At present there is not an explanation for the difference in transcription observed between the  $P_{420}$  and  $P_{500}$  promoter elements but it is assumed that the transcriptional activity exerted by the  $P_{240}$  region represents the *in vivo* situation. Further regulatory characterisation of *yvcA* transcription revealed the same relative effects for both the  $P_{yvcA240}$ -*lacZ* and the  $P_{yvcA500}$ -*lacZ* fusions and only data obtained with the  $P_{yvcA240}$ -*lacZ* fusion are presented in the main manuscript.

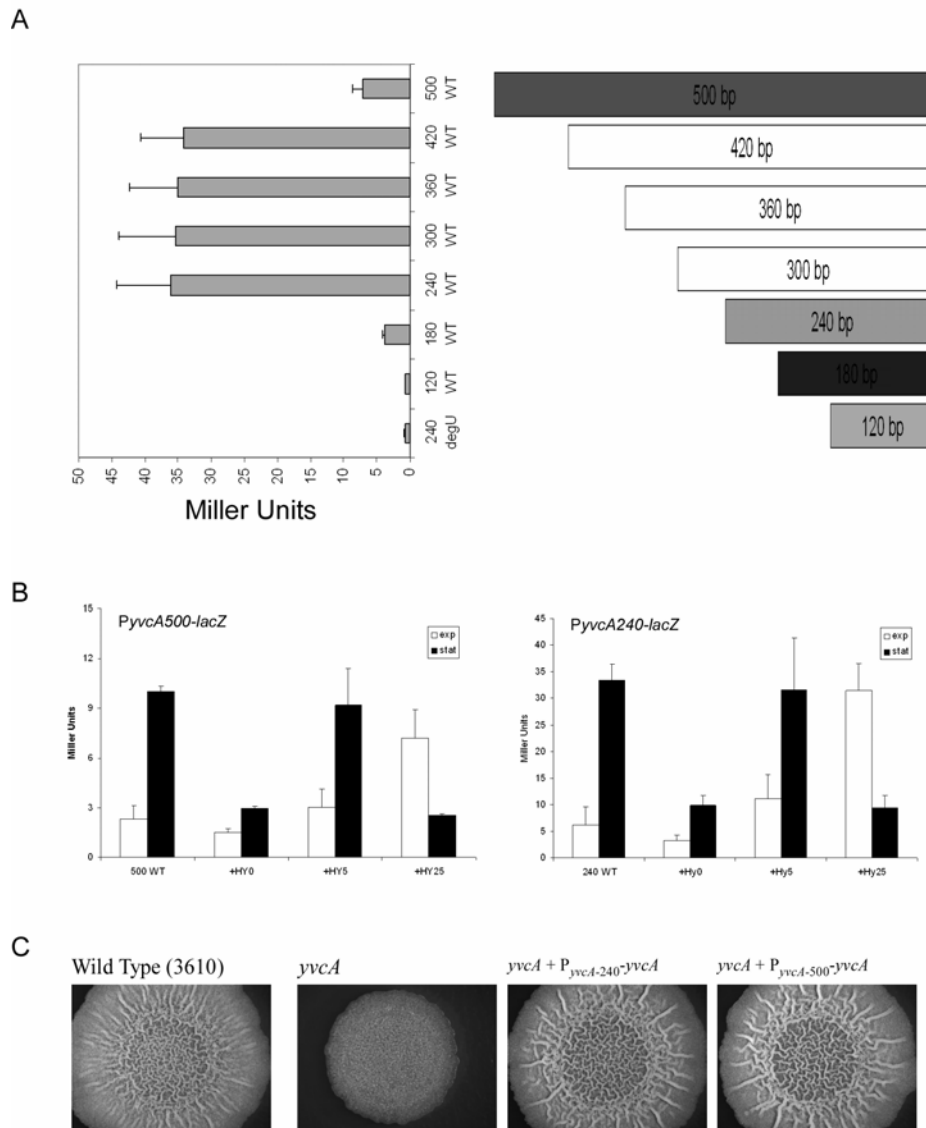

Figure S1

**Figure S1.** (A)  $\beta$ -galactosidase assays of the wild type (WT) strain carrying the *yvcA-lacZ* fusion constructs as indicated under planktonic conditions depicted as Miller Units with the errors representing the standard error of the mean for  $n=3$  independent experiments. (B)  $\beta$ -galactosidase assays of the wild type (WT) and *degU* mutant complemented with the  $P_{IPTG-degU-hy-P}$  (HY) construct carrying the *PycvA500-lacZ* fusion or *PycvA240-lacZ* over time under planktonic growth conditions. The IPTG concentrations used are as indicated, e.g. “+HY 0” represents the absence of IPTG and “+HY 25” represents 25  $\mu$ M IPTG. The IPTG was added 60 minutes after inoculation. (C) Representative images showing the complex colony architecture of strain 3610 (WT), the *yvcA* mutant (NRS1390), *yvcA + PycvA240-yvcA* (NRS2093) and *yvcA + PycvA500-yvcA* (NRS1777) after 40 hours incubation at 37°C on MSgg medium.

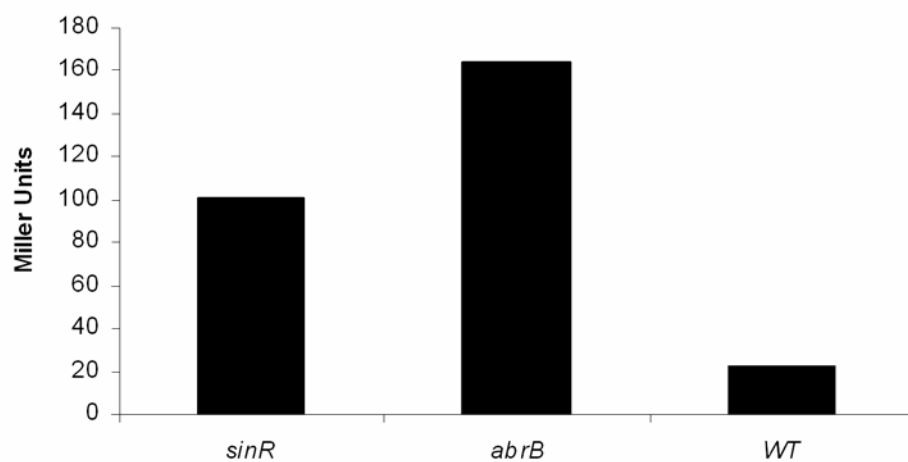

**Figure S2**

Transcription of *yvcA* (*PyvcA-lacZ*) in the wild-type (NRS1608), *abrB* mutant (NRS1644) and the *sinR* mutant (NRS1628) strain backgrounds. Depicted are  $\beta$ -galactosidase activities in logarithmic phase normalised to the total protein concentration in  $\text{mg mL}^{-1}$  (Miller units) measured from cells grown in biofilm medium.

## Materials and Methods

### Construction of *lacZ* transcriptional fusions.

The -120, -180, -240, -300, -360, -420 and -500 promoter regions upstream of the *yvcA* translational start sites were amplified from 3610 genomic DNA using the primers listed in Table S1. PCR fragments were cloned into the *Bam*HI and *Eco*RI sites located upstream of the *lacZ* gene in the *thrC* integration vector pDG1663 (1), using the corresponding sites incorporated into the primers. The resulting plasmid constructs (Table S2) were screened to check for those with the correct insert/orientation and subsequently introduced by selection for double cross-over recombination, via JH642, into the chromosome of NCBI3610 (hereafter 3610).

**Table S1.** Primers used to construct the *yvcA* promoter fusions.

| Primer | Target      | 5' to 3' sequence <sup>a</sup>    | Position <sup>b</sup> |
|--------|-------------|-----------------------------------|-----------------------|
| NSW18  | <i>yvcA</i> | CGAGGCGAATTCGAACGCCAAGCGGAAAT     | -500 to -484          |
| NSW19  | <i>yvcA</i> | CGAGGCGAATTCGGATCCCCTGTCAGGGCAAGT | +50 to +36            |
| NSW400 | <i>yvcA</i> | GGAGGATGCAGTATGAATGAC             | +49 to +69            |
| NSW401 | <i>yvcA</i> | CGTATTCTACTCCTAGGTTATCTTCC        | +579 to +604          |
| NSW408 | <i>yvcA</i> | CGAGGCGAATTCAGCCGGATGATACGGCT     | -243 to -227          |
| NSW409 | <i>yvcA</i> | CGAGGCGAATTCGGGTGTTATATATGATT     | -182 to -166          |
| NSW410 | <i>yvcA</i> | CGAGGCGAATTCCTCAAATCCGCCATGA      | -121 to -106          |
| NSW416 | <i>yvcA</i> | CGAGGCGAATTCCTGCCGCTGGATGATGT     | -304 to -289          |
| NSW419 | <i>yvcA</i> | CGAGGCGAATTCCTCAAATGGGAAGCGG      | -365 to -350          |
| NSW420 | <i>yvcA</i> | CGAGGCGAATTCGTCCGAGAAGAAGCATC     | -422 to -406          |

**Table S2.** Additional plasmids and *Bacillus subtilis* strains used in this study.

| Strain / Plasmid | Relevant genotype <sup>a</sup> / Description                                                                 | Source / Construction <sup>b</sup> |
|------------------|--------------------------------------------------------------------------------------------------------------|------------------------------------|
| JH642            | <i>trpC pheA1</i>                                                                                            | (2)                                |
| 3610             | Prototroph                                                                                                   | B.G.S.C.                           |
| NRS1572          | <i>trpC pheA1 thrC::PyvCA<sub>500</sub>-lacZ (erm)</i>                                                       | (3)                                |
| NRS1582          | 3610 <i>thrC::PyvCA<sub>500</sub>-lacZ (erm)</i>                                                             | (3)                                |
| NRS1583          | 3610 <i>thrC:: PyvCA<sub>500</sub>-lacZ (erm), degU::pBL204 (cat)</i>                                        | (3)                                |
| NRS1584          | 3610 <i>thrC:: PyvCA<sub>500</sub>-lacZ (erm), amyE::Pspank-hy-degU-lacI (spec), degU::pBL204 (cat)</i>      | (3)                                |
| NRS1585          | 3610 <i>thrC:: PyvCA<sub>500</sub>-lacZ (erm), amyE::Pspank-hy-degU(H)32-lacI (spec), degU::pBL204 (cat)</i> | (3)                                |
| NRS1601          | <i>trpC pheA1 thrC::PyvCA<sub>120</sub>-lacZ (erm)</i>                                                       | pNW207 → JH642                     |
| NRS1602          | <i>trpC pheA1 thrC::PyvCA<sub>180</sub>-lacZ (erm)</i>                                                       | pNW208 → JH642                     |
| NRS1603          | <i>trpC pheA1 thrC::PyvCA<sub>180</sub>-lacZ (erm)</i>                                                       | pNW209 → JH642                     |
| NRS1604          | 3610 <i>thrC::PyvCA<sub>120</sub>-lacZ (erm)</i>                                                             | SPP1 NRS1601 → 3610                |
| NRS1606          | 3610 <i>thrC::PyvCA<sub>180</sub>-lacZ (erm)</i>                                                             | SPP1 NRS1602 → 3610                |
| NRS1608          | 3610 <i>thrC::PyvCA<sub>240</sub>-lacZ (erm)</i>                                                             | SPP1 NRS1603 → 3610                |
| NRS1609          | 3610 <i>thrC:: PyvCA<sub>240</sub>-lacZ (erm), degU::pBL204 (cat)</i>                                        | SPP1 NRS1603 → NRS1314             |
| NRS1614          | 3610 <i>thrC:: PyvCA<sub>240</sub>-lacZ (erm), amyE::Pspank-hy-degU(H)32-lacI (spec), degU::pBL204 (cat)</i> | SPP1 NRS1311 → NRS1609             |
| NRS1615          | 3610 <i>thrC:: PyvCA<sub>240</sub>-lacZ (erm), amyE::Pspank-hy-degU-lacI (spec), degU::pBL204 (cat)</i>      | SPP1 NRS1312 → NRS1609             |
| NRS1628          | 3610 <i>thrC::PyvCA<sub>240</sub>-lacZ (erm), sinR::cat</i>                                                  | SPP1 BAL2423 → NRS1608             |
| NRS1629          | 3610 <i>thrC::PyvCA<sub>500</sub>-lacZ (erm), sinR::cat</i>                                                  | SPP1 BAL2423 → NRS1582             |
| NRS1631          | 3610 <i>thrC::PyvCA<sub>240</sub>-lacZ (erm), spo0A(D56N) (spec)</i>                                         | SPP1 BAL679 → NRS1608              |
| NRS1632          | 3610 <i>thrC::PyvCA<sub>500</sub>-lacZ (erm), spo0A(D56N) (spec)</i>                                         | SPP1 BAL679 → NRS1582              |
| NRS1639          | <i>trpC pheA1 thrC::PyvCA<sub>300</sub>-lacZ (erm)</i>                                                       | pNW215 → JH642                     |
| NRS1640          | <i>trpC pheA1 thrC::PyvCA<sub>500</sub>-lacZ (erm)</i>                                                       | pNW216 → JH642                     |
| NRS1641          | 3610 <i>thrC::PyvCA<sub>300</sub>-lacZ (erm)</i>                                                             | SPP1 NRS1639 → 3610                |
| NRS1642          | 3610 <i>thrC::PyvCA<sub>500</sub>-lacZ (erm)</i>                                                             | SPP1 NRS1640 → 3610                |
| NRS1643          | 3610 <i>thrC::PyvCA<sub>500</sub>-lacZ (erm), abrB::cat</i>                                                  | SPP1 AG → NRS1582                  |
| NRS1644          | 3610 <i>thrC::PyvCA<sub>240</sub>-lacZ (erm), abrB::cat</i>                                                  | SPP1 AG → NRS1608                  |
| NRS1645          | <i>trpC pheA1 thrC::PyvCA<sub>360</sub>-lacZ (erm)</i>                                                       | pNW217 → JH642                     |
| NRS1646          | <i>trpC pheA1 thrC::PyvCA<sub>420</sub>-lacZ (erm)</i>                                                       | pNW218 → JH642                     |

| Strain          | /    | Relevant genotype <sup>a</sup> /Description                                                                 | Source / Construction <sup>b</sup> |
|-----------------|------|-------------------------------------------------------------------------------------------------------------|------------------------------------|
| <b>Plasmid</b>  |      |                                                                                                             |                                    |
| NRS2066         | 3610 | <i>thrC::Pyvca<sub>500</sub>-lacZ</i> ( <i>erm</i> ), <i>abrB::cat</i> , <i>spo0A(D56N)</i> ( <i>spec</i> ) | SPP1 BAL679 → NRS1643              |
| NRS2067         | 3610 | <i>thrC::Pyvca<sub>240</sub>-lacZ</i> ( <i>erm</i> ), <i>abrB::cat</i> , <i>spo0A(D56N)</i> ( <i>spec</i> ) | SPP1 BAL679 → NRS1644              |
| NRS2068         | 3610 | <i>thrC::Pyvca<sub>360</sub>-lacZ</i> ( <i>erm</i> )                                                        | SPP1 NRS1645 → 3610                |
| NRS2069         | 3610 | <i>thrC::Pyvca<sub>420</sub>-lacZ</i> ( <i>erm</i> )                                                        | SPP1 NRS1646 → 3610                |
| NRS2090         |      | <i>trpC pheA1 amyE::Pyvca<sub>240</sub>-yvcA</i> ( <i>spc</i> )                                             | pNW221 → JH642                     |
| NRS2093         | 3610 | <i>yvcA::pNW34</i> ( <i>cat</i> ) <i>amyE::Pyvca<sub>240</sub>-yvcA</i> ( <i>spc</i> )                      | SPP1 NRS2090 → NRS1390             |
| <b>Plasmids</b> |      |                                                                                                             |                                    |
| pNW204          |      | <i>Pyvca<sub>500</sub>-lacZ @ thrC</i> in pDG1663                                                           | (3)                                |
| pNW207          |      | <i>Pyvca<sub>120</sub>-lacZ @ thrC</i> in pDG1663                                                           | This Study                         |
| pNW208          |      | <i>Pyvca<sub>180</sub>-lacZ @ thrC</i> in pDG1663                                                           | This Study                         |
| pNW209          |      | <i>Pyvca<sub>240</sub>-lacZ @ thrC</i> in pDG1663                                                           | This Study                         |
| pNW215          |      | <i>Pyvca<sub>300</sub>-lacZ @ thrC</i> in pDG1663                                                           | This Study                         |
| pNW216          |      | <i>Pyvca<sub>500</sub>-lacZ @ thrC</i> in pDG1663                                                           | This Study                         |
| pNW217          |      | <i>Pyvca<sub>360</sub>-lacZ @ thrC</i> in pDG1663                                                           | This Study                         |
| pNW218          |      | <i>Pyvca<sub>420</sub>-lacZ @ thrC</i> in pDG1663                                                           | This Study                         |
| pNW221          |      | <i>Pyvca<sub>240</sub>-yvcA @ amyE</i> in pDR111                                                            | This Study                         |

<sup>a.</sup> Drug resistance cassettes are indicated as follows: *spec*, spectinomycin resistance; *cat*, chloramphenicol resistance; and *erm*, erythromycin resistance.

<sup>b.</sup> The direction of strain construction is indicated with DNA or phage (SPP1) (→) recipient.

### Supplemental References

1. **Guerout-Fleury, A. M., N. Frandsen, and P. Stragier.** 1996. Plasmids for ectopic integration in *Bacillus subtilis*. *Gene* **180**:57-61.
2. **Perego, M., G. B. Spiegelman, and J. A. Hoch.** 1988. Structure of the gene for the transition state regulator, *abrB*:regulator synthesis is controlled by the *spo0A* sporulation gene in *Bacillus subtilis*. *Molecular Microbiology* **2**:689-699.
3. **Verhamme, D. T., T. B. Kiley, and N. R. Stanley-Wall.** 2007. DegU coordinates multicellular behaviour exhibited by *Bacillus subtilis*. *Mol Microbiol* **65**:554-68.
